# Supplementary material
Source: PubMed Central journal article supplement (PMC6935388)

Supplemental Figure 1

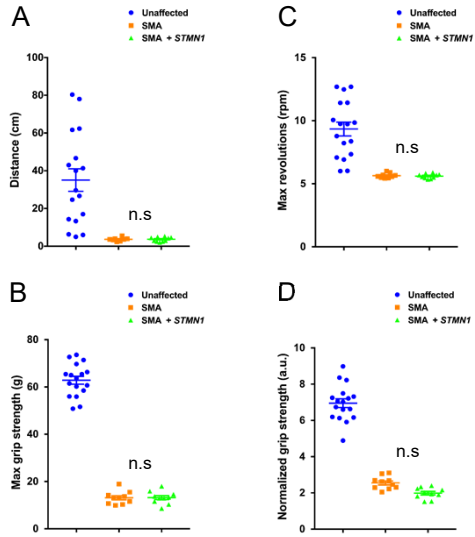

Supplemental Figure 2

### A Brain

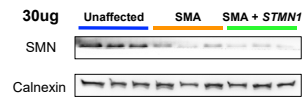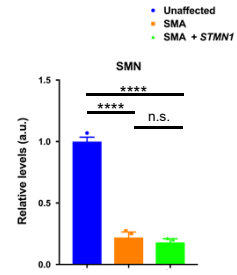

### B Spinal Cord

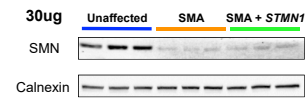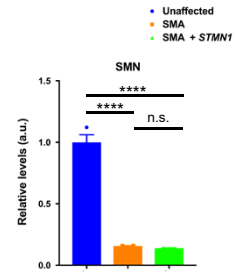

Supplemental Figure 3

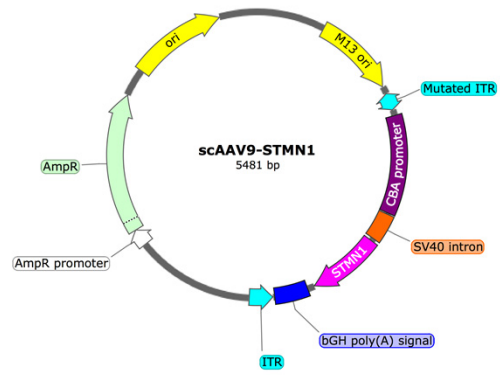

Supplemental Figure 4

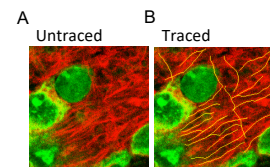

Supplement: supplemental_figures_1-4_ddz188.pdf [file supplemental_figures_1-4_ddz188.pdf]
